# Supplementary material for: Very Broadband Strain-Rate Measurements Along a Submarine Fiber-Optic Cable Off Cape Muroto, Nankai Subduction Zone, Japan
Source: Research Square preprint supplement (doi:10.21203/rs.3.rs-121961/v1), 2020-12-08
Supplement: Supplementary file 1 [file b4f6672c66ea3f317933d100.pdf]

Additional File

Figure S1. Standard deviation of observation at each channel.

Figure S2. Spectrogram at 10 selected channels.

Figure S3. Strain rate periodgram for each channels.

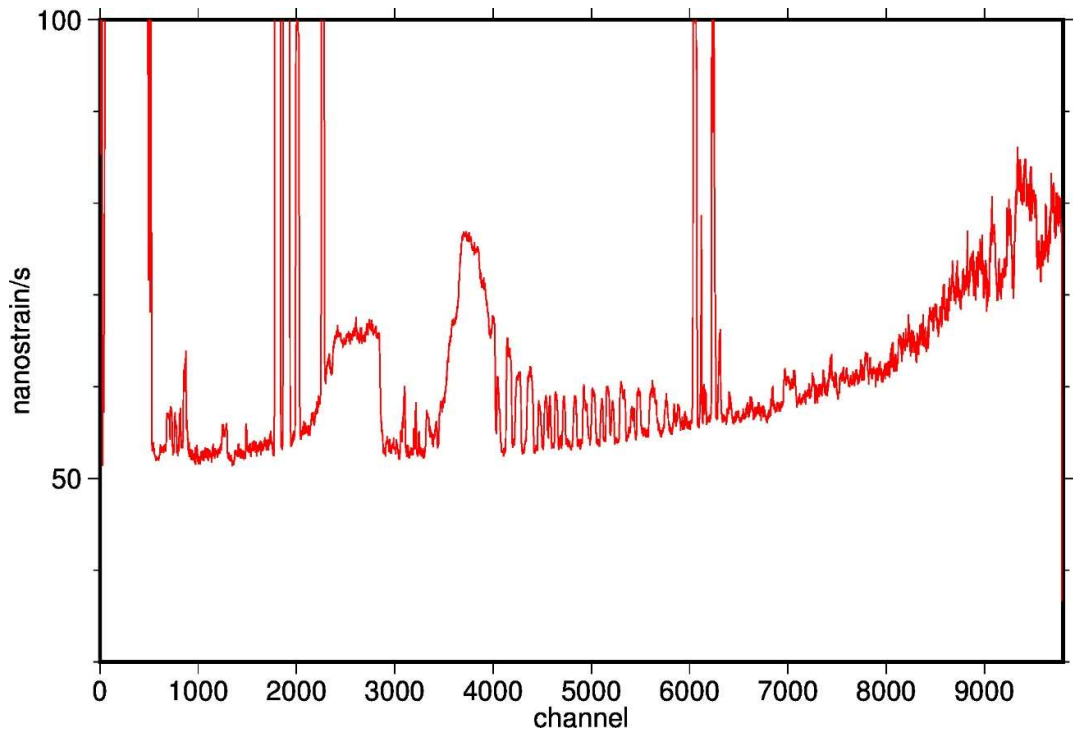

Figure S1. Standard deviation of observation at each channel. Median values of standard deviation of strain rate, measured for each five minute at each channels.

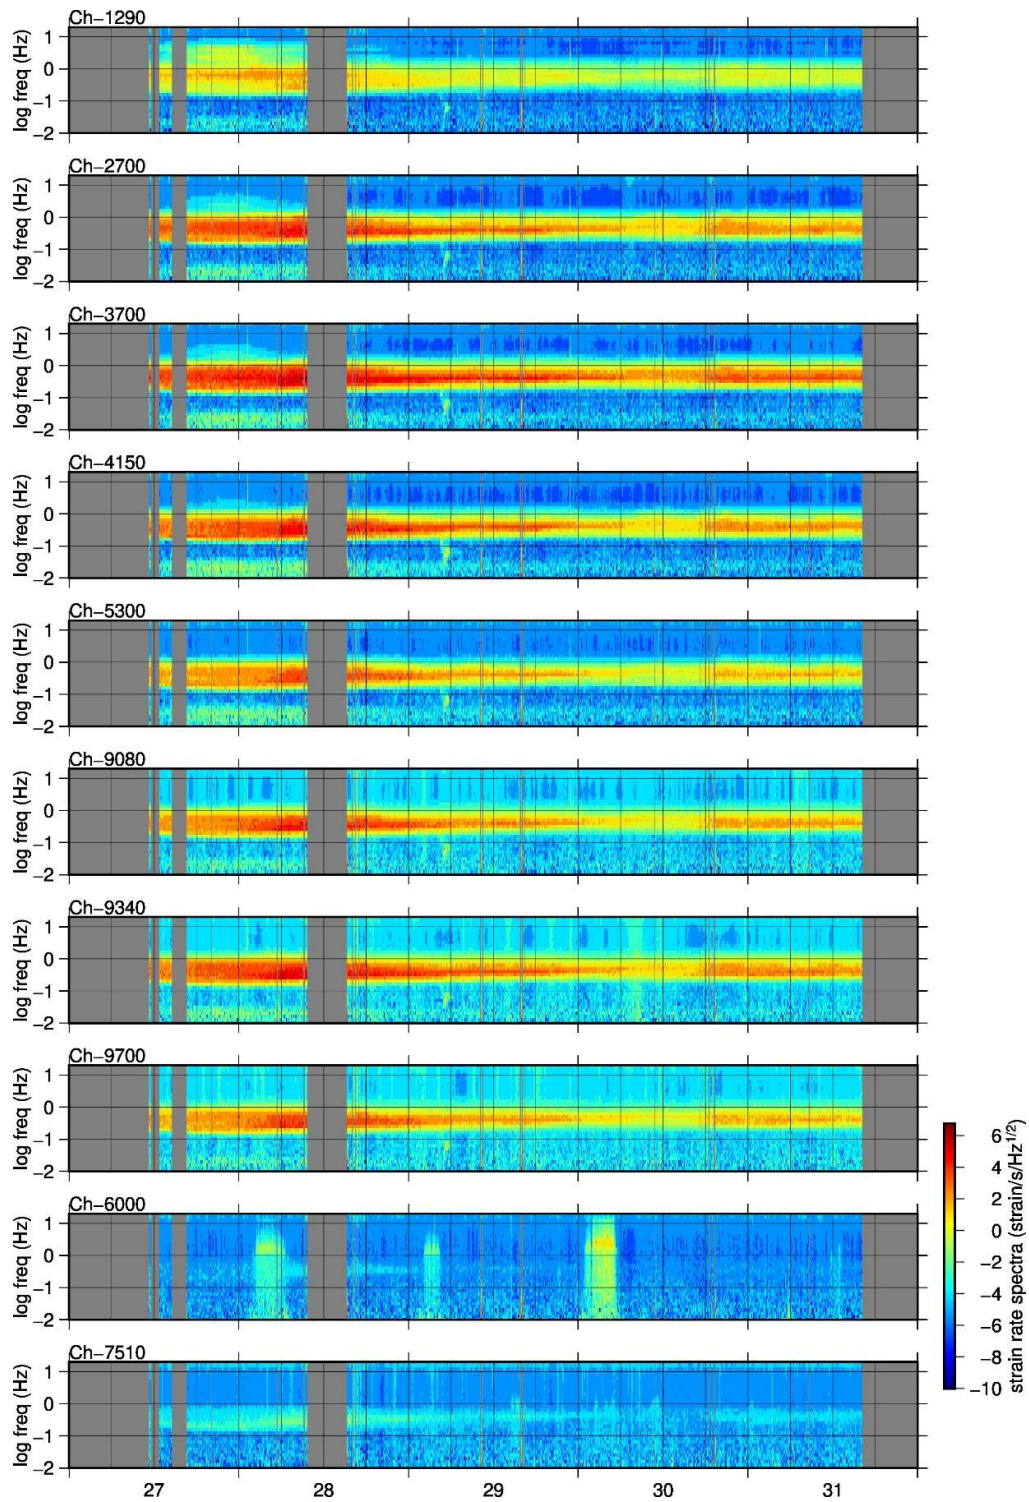

Figure S2. Spectrogram at 10 selected channels. This shows periodogram of strain rate calculated for every five minutes.

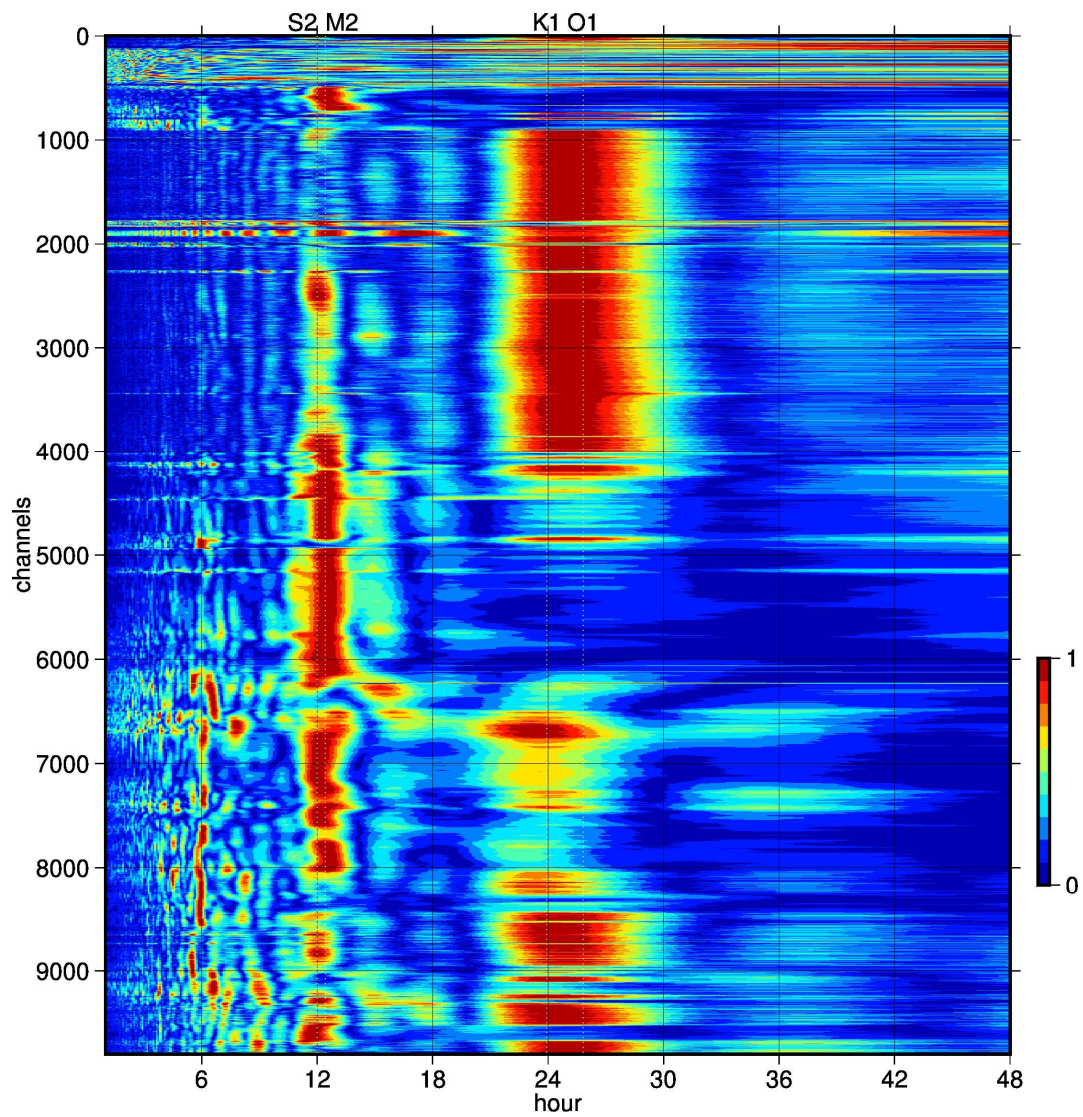

Figure S3. Strain rate periodogram for each channels. Normalized for each channels. S2, M2, K1, and O1 show the period of four large tide constituents.
